# Supplementary material for: Switchable synthesis of 2,5-dimethylfuran and 2,5-dihydroxymethyltetrahydrofuran from 5-hydroxymethylfurfural over Raney Ni catalyst
Source: Royal Society of Chemistry journal article supplement (doi:10.1039/c4ra09550b), 2014-01-01
Supplement: c4ra09550b1.pdf [file c4ra09550b1.pdf]

1  
2  
3  
4  
5  
6  
7  
8  
9  
10  
11  
12  
13  
14  
15  
16  
17  
18  
19  
20  
21  
22

*Electronic Supplementary Information (ESI) for:*

**Switchable synthesis of 2,5-dimethylfuran and 2,5-dihydroxymethyltetrahydrofuran from 5-hydroxymethylfurfural over Raney Ni catalyst**

Xiao Kong,<sup>a,b</sup> Yifeng Zhu,<sup>a,b</sup> Hongyan Zheng,<sup>c</sup> Fang Dong,<sup>a,b</sup> Yulei Zhu,<sup>\*a,c</sup> and  
Yong-Wang Li<sup>a,c</sup>

<sup>a</sup> *State Key Laboratory of Coal Conversion, Institute of Coal Chemistry, Chinese Academy of Sciences, Taiyuan 030001, PR China*

<sup>b</sup> *University of Chinese Academy of Sciences, Beijing 100039, PR China*

<sup>c</sup> *Synfuels China Co. Ltd, Beijing, 101407, PR China*

\*Corresponding author: *State Key Laboratory of Coal Conversion, Institute of Coal Chemistry, Chinese Academy of Sciences, Taiyuan 030001, PR China. Tel.: +86 351 7117097; fax: +86 351 7560668.*

E-mail address: [zhuyulei@sxicc.ac.cn](mailto:zhuyulei@sxicc.ac.cn) (Y. Zhu).

1 **The supplementary information includes:**

2 Figure S1 to S2

3 Scheme S1 to S3

4

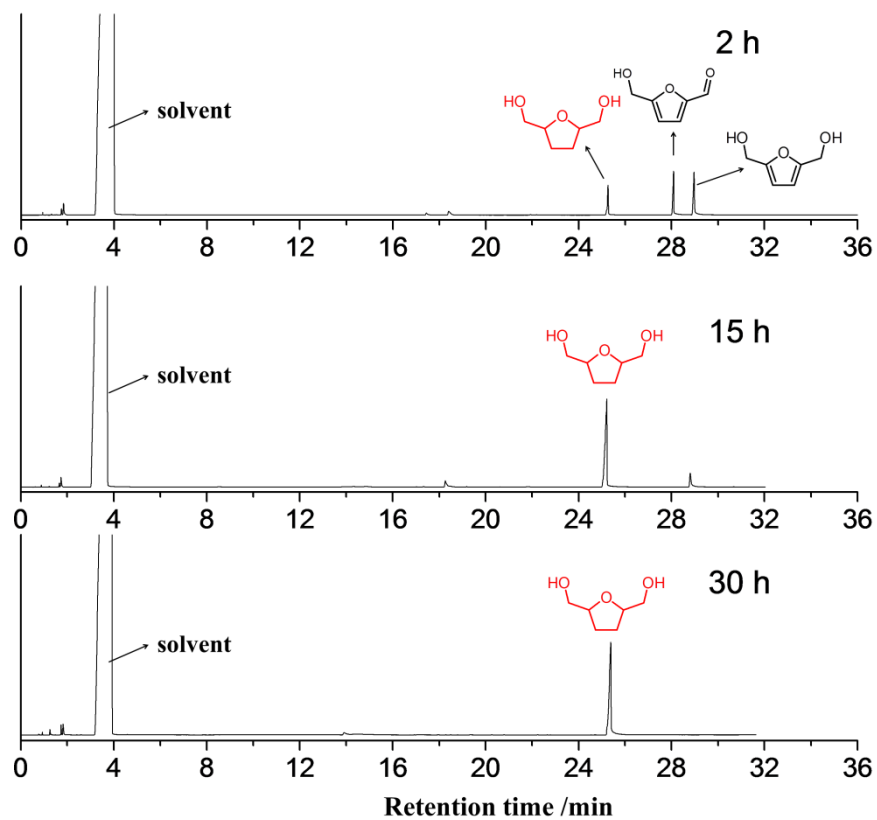

1

2

3

**Figure S1.** Typical GC charts of the products at 100 °C.

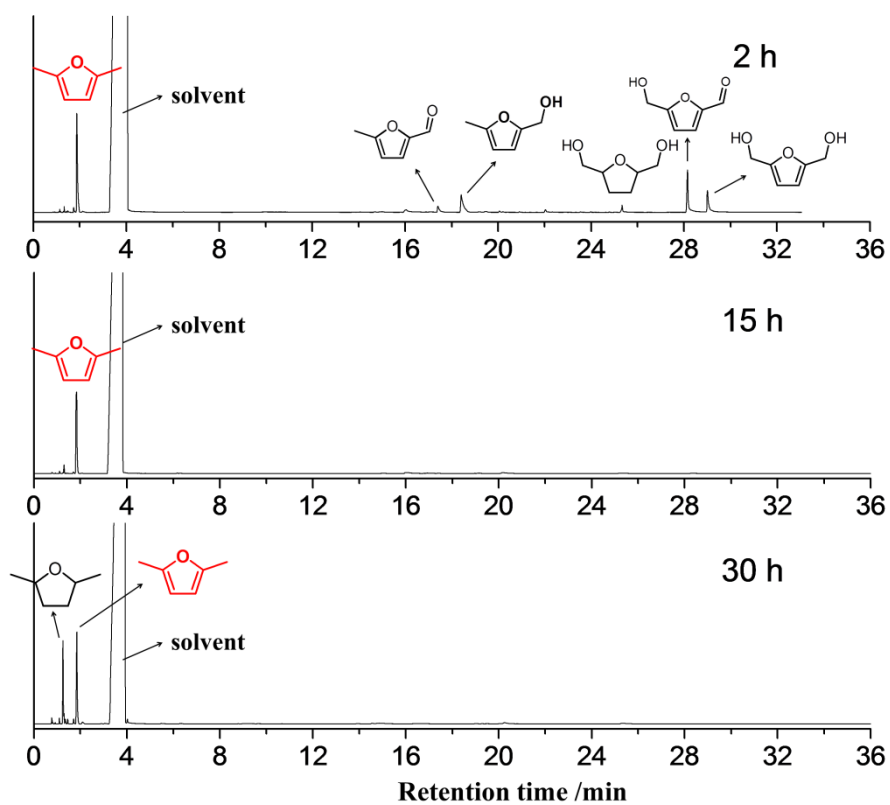

1

2

3

**Figure S2.** Typical GC charts of the products at 180 °C.

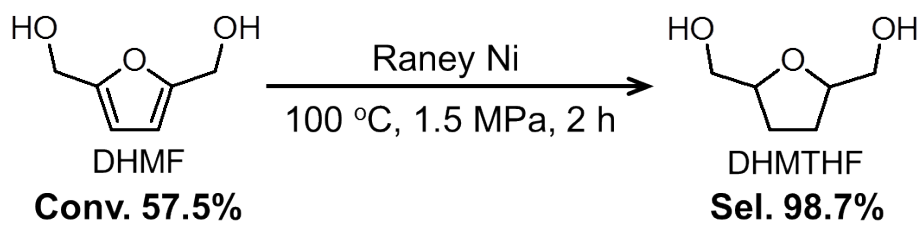

1

2

**Scheme S1.** DHMF hydrogenation over Raney Ni at 100 °C.

3

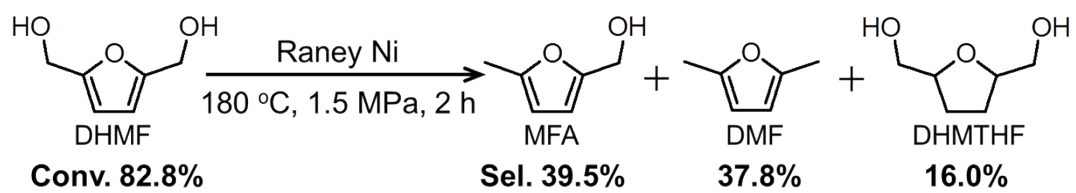

1

2

**Scheme S2** DHMF hydrogenation over Raney Ni at 180 °C.

3

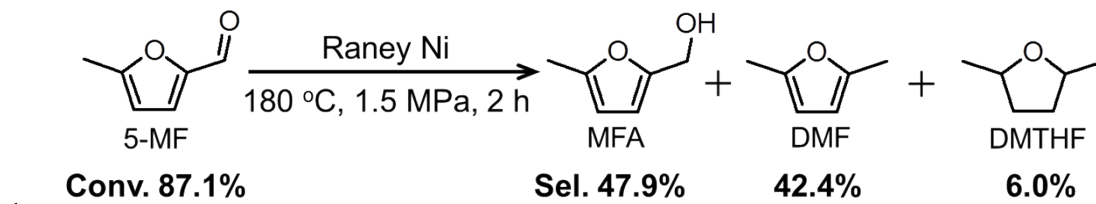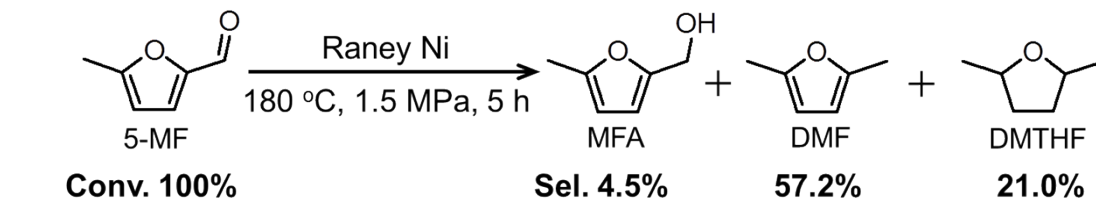

3 **Scheme S3.** 5-MF hydrogenation over Raney Ni at 180 °C.

4

5
